# Supplementary material
Source: Springer Nature journal article supplement (https://www.springermedizin.de/resource/supplementary/13049_2010_174_MOESM2_ESM.pdf/9666034)

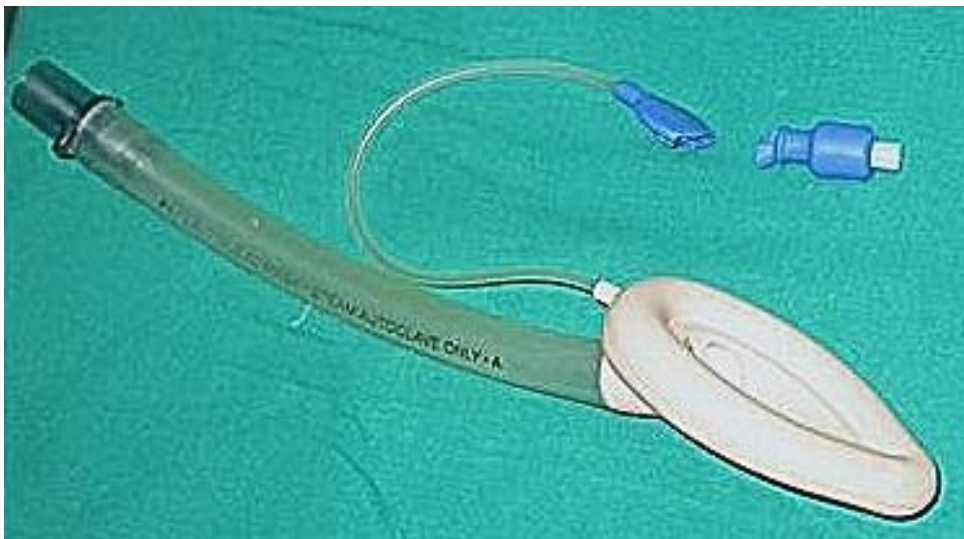

Supplement: MOESM2 [file 9666034]
